# Supplementary material for: A tied-weight autoencoder for the linear dimensionality reduction of sample data
Source: Research Square preprint supplement (doi:10.21203/rs.3.rs-4627864/v1), 2024-07-17
Supplement: Supplementary file 1 [file b304a8b1ec8d772c2aa6f793.pdf]

## Supplementary Information

### A tied-weight autoencoder for the linear dimensionality reduction of sample data

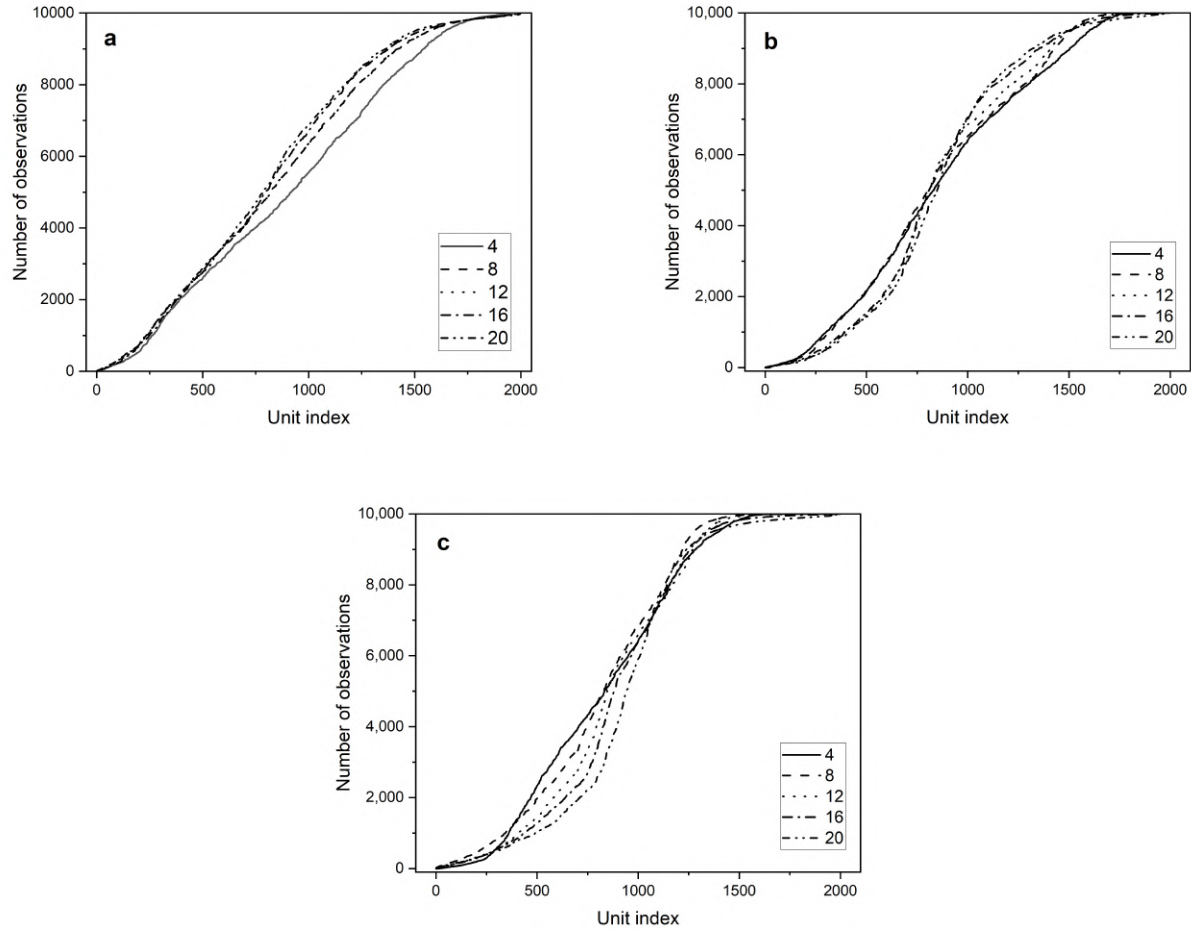

**Figure S1.** Plots of the number of observations versus the unit indices in ascending order of their observations. The number of units used and the total number of observations are 2,000 and 10,000, respectively. Each plot is drawn with different code sizes: 4, 8, 12, 16, and 20. (a) FMNIST, (b) SVHN, and (c) CIFAR10.

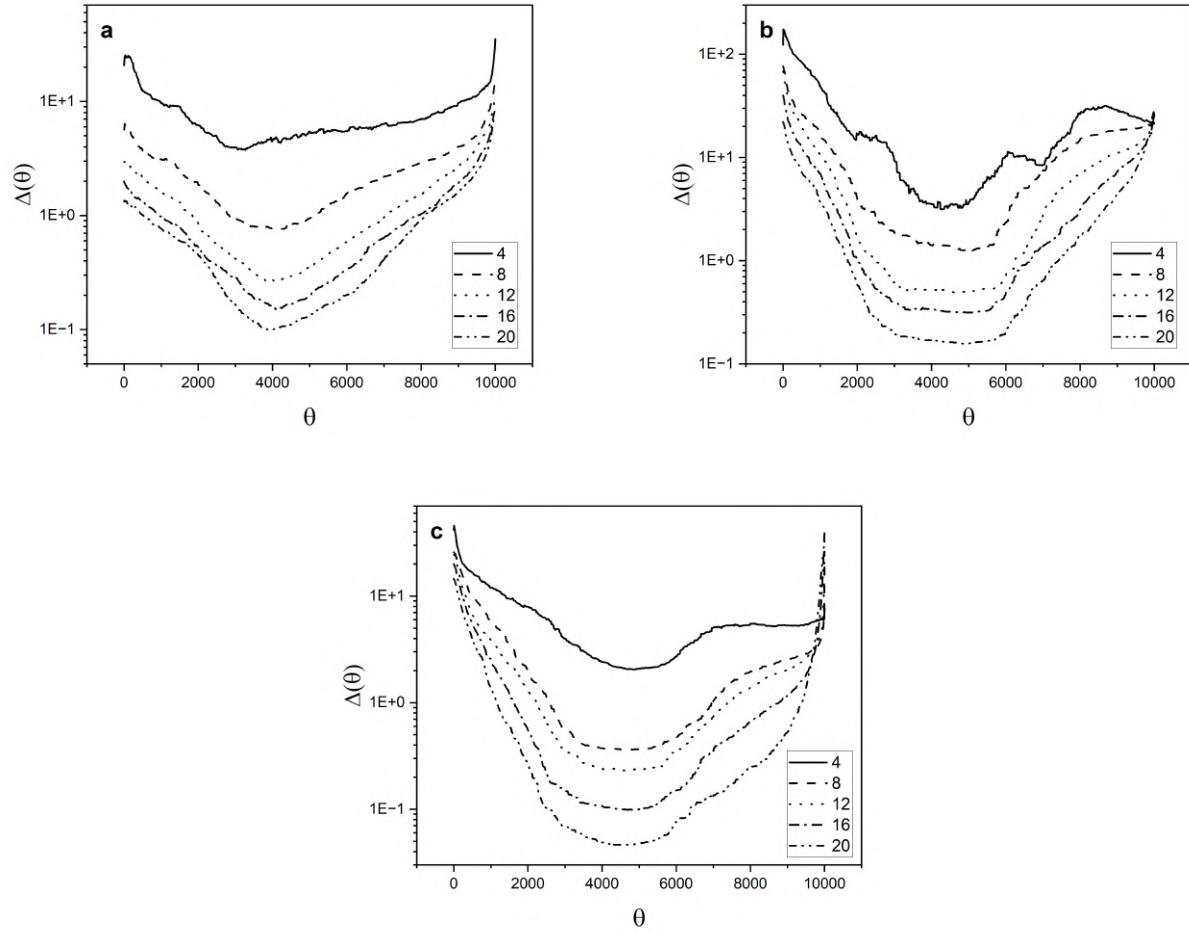

**Figure S2.** Plots of  $\Delta(\theta)$  versus  $\theta$  drawn with different code sizes: 4, 8, 12, 16, and 20. (a) FMNIST, (b) SVHN, and (c) CIFAR10.

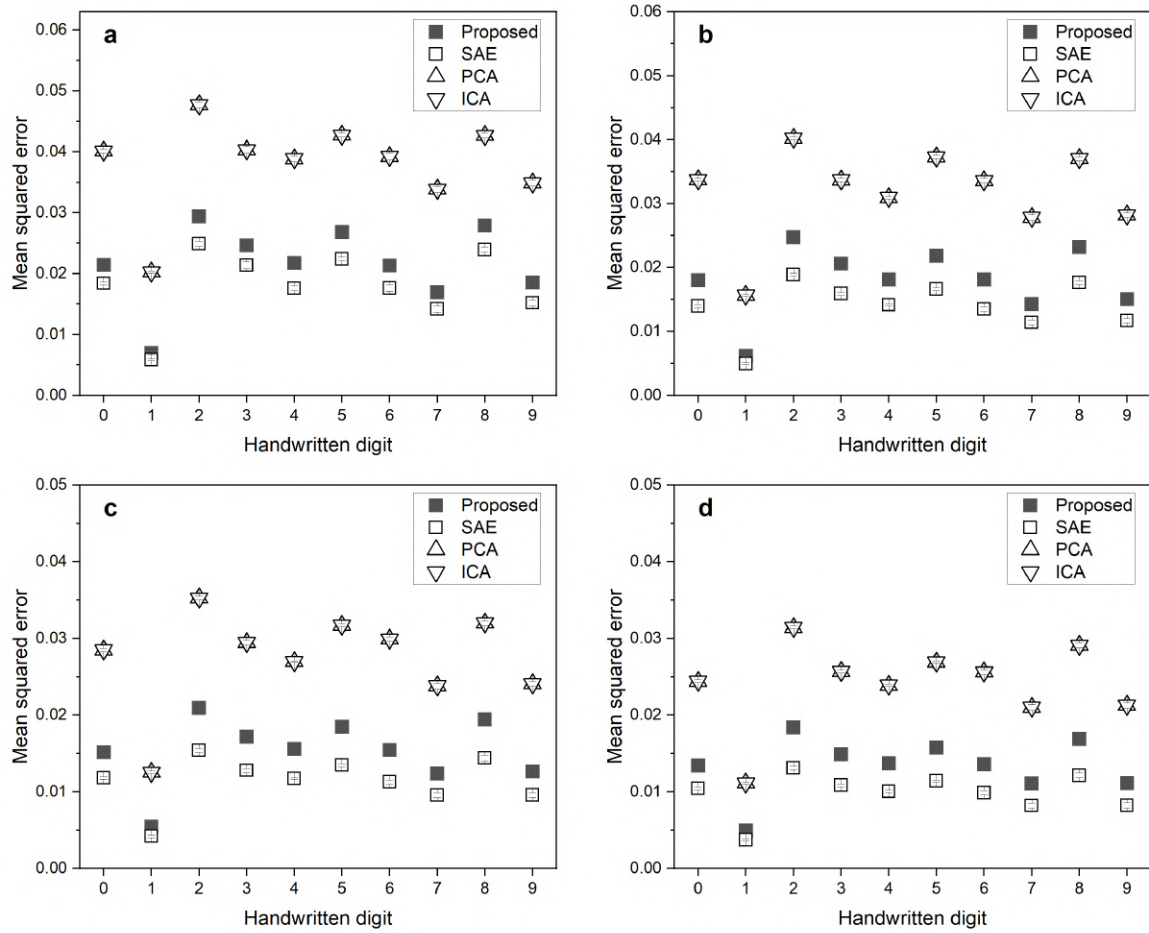

**Figure S3.** Plots of the mean squared error for each class label of MNIST when the number of codes is (a) 8, (b) 12, (c) 16, and (d) 20.

| (a) FMNIST: Mean squared error averaged over independent trials |             |       |       |       |       |       |       |       |       |       |
|-----------------------------------------------------------------|-------------|-------|-------|-------|-------|-------|-------|-------|-------|-------|
| code size 8                                                     |             |       |       |       |       |       |       |       |       |       |
| Model                                                           | Class label |       |       |       |       |       |       |       |       |       |
|                                                                 | 0           | 1     | 2     | 3     | 4     | 5     | 6     | 7     | 8     | 9     |
| Proposed                                                        | 0.015       | 0.009 | 0.015 | 0.015 | 0.014 | 0.023 | 0.015 | 0.012 | 0.024 | 0.017 |
| SAE                                                             | 0.013       | 0.007 | 0.012 | 0.012 | 0.012 | 0.020 | 0.013 | 0.011 | 0.021 | 0.014 |
| PCA                                                             | 0.023       | 0.023 | 0.025 | 0.027 | 0.024 | 0.034 | 0.024 | 0.021 | 0.036 | 0.030 |
| ICA                                                             | 0.023       | 0.023 | 0.025 | 0.027 | 0.024 | 0.034 | 0.024 | 0.021 | 0.036 | 0.030 |
| code size 12                                                    |             |       |       |       |       |       |       |       |       |       |
| Model                                                           | Class label |       |       |       |       |       |       |       |       |       |
|                                                                 | 0           | 1     | 2     | 3     | 4     | 5     | 6     | 7     | 8     | 9     |
| Proposed                                                        | 0.013       | 0.008 | 0.013 | 0.013 | 0.012 | 0.021 | 0.014 | 0.011 | 0.022 | 0.015 |
| SAE                                                             | 0.011       | 0.006 | 0.010 | 0.011 | 0.010 | 0.017 | 0.012 | 0.010 | 0.018 | 0.013 |
| PCA                                                             | 0.020       | 0.017 | 0.021 | 0.021 | 0.020 | 0.032 | 0.020 | 0.019 | 0.032 | 0.026 |
| ICA                                                             | 0.020       | 0.017 | 0.021 | 0.021 | 0.020 | 0.032 | 0.020 | 0.019 | 0.032 | 0.026 |
| code size 16                                                    |             |       |       |       |       |       |       |       |       |       |
| Model                                                           | Class label |       |       |       |       |       |       |       |       |       |
|                                                                 | 0           | 1     | 2     | 3     | 4     | 5     | 6     | 7     | 8     | 9     |
| Proposed                                                        | 0.012       | 0.008 | 0.012 | 0.012 | 0.011 | 0.019 | 0.013 | 0.010 | 0.021 | 0.014 |
| SAE                                                             | 0.010       | 0.005 | 0.009 | 0.010 | 0.009 | 0.016 | 0.011 | 0.009 | 0.016 | 0.011 |
| PCA                                                             | 0.018       | 0.015 | 0.019 | 0.018 | 0.018 | 0.029 | 0.018 | 0.017 | 0.029 | 0.023 |
| ICA                                                             | 0.018       | 0.015 | 0.019 | 0.018 | 0.018 | 0.029 | 0.018 | 0.017 | 0.029 | 0.023 |
| code size 20                                                    |             |       |       |       |       |       |       |       |       |       |
| Model                                                           | Class label |       |       |       |       |       |       |       |       |       |
|                                                                 | 0           | 1     | 2     | 3     | 4     | 5     | 6     | 7     | 8     | 9     |
| Proposed                                                        | 0.011       | 0.007 | 0.011 | 0.011 | 0.011 | 0.018 | 0.012 | 0.010 | 0.020 | 0.013 |
| SAE                                                             | 0.009       | 0.005 | 0.008 | 0.009 | 0.008 | 0.014 | 0.010 | 0.008 | 0.015 | 0.011 |
| PCA                                                             | 0.016       | 0.014 | 0.016 | 0.017 | 0.016 | 0.027 | 0.016 | 0.016 | 0.026 | 0.021 |
| ICA                                                             | 0.016       | 0.014 | 0.016 | 0.017 | 0.016 | 0.027 | 0.016 | 0.016 | 0.026 | 0.021 |

| (b) SVHN: Mean squared error averaged over independent trials |             |       |       |       |       |       |       |       |       |       |
|---------------------------------------------------------------|-------------|-------|-------|-------|-------|-------|-------|-------|-------|-------|
| code size 8                                                   |             |       |       |       |       |       |       |       |       |       |
| Model                                                         | class label |       |       |       |       |       |       |       |       |       |
|                                                               | 0           | 1     | 2     | 3     | 4     | 5     | 6     | 7     | 8     | 9     |
| Proposed                                                      | 0.120       | 0.138 | 0.138 | 0.133 | 0.141 | 0.137 | 0.132 | 0.133 | 0.139 | 0.137 |
| SAE                                                           | 0.114       | 0.128 | 0.130 | 0.125 | 0.132 | 0.128 | 0.122 | 0.125 | 0.130 | 0.127 |
| PCA                                                           | 0.134       | 0.155 | 0.151 | 0.146 | 0.155 | 0.152 | 0.150 | 0.147 | 0.151 | 0.153 |
| ICA                                                           | 0.134       | 0.155 | 0.151 | 0.146 | 0.155 | 0.152 | 0.150 | 0.147 | 0.151 | 0.153 |
| code size 12                                                  |             |       |       |       |       |       |       |       |       |       |
| Model                                                         | class label |       |       |       |       |       |       |       |       |       |
|                                                               | 0           | 1     | 2     | 3     | 4     | 5     | 6     | 7     | 8     | 9     |
| Proposed                                                      | 0.107       | 0.119 | 0.119 | 0.116 | 0.122 | 0.118 | 0.114 | 0.116 | 0.122 | 0.118 |
| SAE                                                           | 0.102       | 0.112 | 0.114 | 0.110 | 0.115 | 0.112 | 0.107 | 0.111 | 0.116 | 0.112 |
| PCA                                                           | 0.121       | 0.137 | 0.135 | 0.132 | 0.138 | 0.135 | 0.131 | 0.131 | 0.136 | 0.135 |
| ICA                                                           | 0.121       | 0.137 | 0.135 | 0.132 | 0.138 | 0.135 | 0.131 | 0.131 | 0.136 | 0.135 |
| code size 16                                                  |             |       |       |       |       |       |       |       |       |       |
| Model                                                         | class label |       |       |       |       |       |       |       |       |       |
|                                                               | 0           | 1     | 2     | 3     | 4     | 5     | 6     | 7     | 8     | 9     |
| Proposed                                                      | 0.097       | 0.108 | 0.108 | 0.105 | 0.110 | 0.107 | 0.103 | 0.106 | 0.109 | 0.107 |
| SAE                                                           | 0.093       | 0.102 | 0.103 | 0.100 | 0.105 | 0.102 | 0.098 | 0.101 | 0.103 | 0.102 |
| PCA                                                           | 0.112       | 0.124 | 0.124 | 0.120 | 0.126 | 0.123 | 0.118 | 0.121 | 0.125 | 0.124 |
| ICA                                                           | 0.112       | 0.124 | 0.124 | 0.120 | 0.126 | 0.123 | 0.118 | 0.121 | 0.125 | 0.124 |
| code size 20                                                  |             |       |       |       |       |       |       |       |       |       |
| Model                                                         | class label |       |       |       |       |       |       |       |       |       |
|                                                               | 0           | 1     | 2     | 3     | 4     | 5     | 6     | 7     | 8     | 9     |
| Proposed                                                      | 0.091       | 0.102 | 0.101 | 0.099 | 0.103 | 0.101 | 0.097 | 0.100 | 0.102 | 0.099 |
| SAE                                                           | 0.086       | 0.095 | 0.095 | 0.092 | 0.097 | 0.095 | 0.091 | 0.094 | 0.096 | 0.093 |
| PCA                                                           | 0.104       | 0.116 | 0.114 | 0.112 | 0.117 | 0.115 | 0.110 | 0.113 | 0.116 | 0.113 |
| ICA                                                           | 0.104       | 0.116 | 0.114 | 0.112 | 0.117 | 0.115 | 0.110 | 0.113 | 0.116 | 0.113 |

| (c) CIFAR10: Mean squared error averaged over independent trials |             |       |       |       |       |       |       |       |       |       |
|------------------------------------------------------------------|-------------|-------|-------|-------|-------|-------|-------|-------|-------|-------|
| code size 8                                                      |             |       |       |       |       |       |       |       |       |       |
| Model                                                            | class label |       |       |       |       |       |       |       |       |       |
|                                                                  | 0           | 1     | 2     | 3     | 4     | 5     | 6     | 7     | 8     | 9     |
| Proposed                                                         | 0.159       | 0.182 | 0.192 | 0.198 | 0.201 | 0.197 | 0.206 | 0.192 | 0.164 | 0.187 |
| SAE                                                              | 0.149       | 0.168 | 0.179 | 0.184 | 0.190 | 0.182 | 0.195 | 0.178 | 0.153 | 0.173 |
| PCA                                                              | 0.165       | 0.187 | 0.196 | 0.203 | 0.203 | 0.202 | 0.209 | 0.198 | 0.169 | 0.191 |
| ICA                                                              | 0.165       | 0.187 | 0.196 | 0.203 | 0.203 | 0.202 | 0.209 | 0.198 | 0.169 | 0.191 |
| code size 12                                                     |             |       |       |       |       |       |       |       |       |       |
| Model                                                            | class label |       |       |       |       |       |       |       |       |       |
|                                                                  | 0           | 1     | 2     | 3     | 4     | 5     | 6     | 7     | 8     | 9     |
| Proposed                                                         | 0.146       | 0.166 | 0.176 | 0.181 | 0.187 | 0.180 | 0.193 | 0.176 | 0.151 | 0.170 |
| SAE                                                              | 0.137       | 0.156 | 0.164 | 0.167 | 0.176 | 0.166 | 0.183 | 0.164 | 0.141 | 0.159 |
| PCA                                                              | 0.152       | 0.175 | 0.182 | 0.187 | 0.192 | 0.187 | 0.197 | 0.183 | 0.157 | 0.177 |
| ICA                                                              | 0.152       | 0.175 | 0.182 | 0.187 | 0.192 | 0.187 | 0.197 | 0.183 | 0.157 | 0.177 |
| code size 16                                                     |             |       |       |       |       |       |       |       |       |       |
| Model                                                            | class label |       |       |       |       |       |       |       |       |       |
|                                                                  | 0           | 1     | 2     | 3     | 4     | 5     | 6     | 7     | 8     | 9     |
| Proposed                                                         | 0.136       | 0.156 | 0.163 | 0.167 | 0.176 | 0.167 | 0.184 | 0.165 | 0.140 | 0.158 |
| SAE                                                              | 0.127       | 0.146 | 0.153 | 0.155 | 0.167 | 0.154 | 0.175 | 0.154 | 0.132 | 0.149 |
| PCA                                                              | 0.141       | 0.163 | 0.169 | 0.173 | 0.181 | 0.173 | 0.188 | 0.171 | 0.146 | 0.165 |
| ICA                                                              | 0.141       | 0.163 | 0.169 | 0.173 | 0.181 | 0.173 | 0.188 | 0.171 | 0.146 | 0.165 |
| code size 20                                                     |             |       |       |       |       |       |       |       |       |       |
| Model                                                            | class label |       |       |       |       |       |       |       |       |       |
|                                                                  | 0           | 1     | 2     | 3     | 4     | 5     | 6     | 7     | 8     | 9     |
| Proposed                                                         | 0.127       | 0.147 | 0.154 | 0.156 | 0.168 | 0.156 | 0.176 | 0.155 | 0.132 | 0.148 |
| SAE                                                              | 0.120       | 0.139 | 0.144 | 0.146 | 0.159 | 0.145 | 0.167 | 0.146 | 0.124 | 0.140 |
| PCA                                                              | 0.132       | 0.153 | 0.159 | 0.162 | 0.172 | 0.161 | 0.179 | 0.161 | 0.137 | 0.154 |
| ICA                                                              | 0.132       | 0.153 | 0.159 | 0.162 | 0.172 | 0.161 | 0.179 | 0.161 | 0.137 | 0.154 |

**Figure S4.** Results of mean squared error for each class label when the number of codes is 8, 12, 16, and 20. (a) FMNIST, (b) SVHN, and (c) CIFAR10



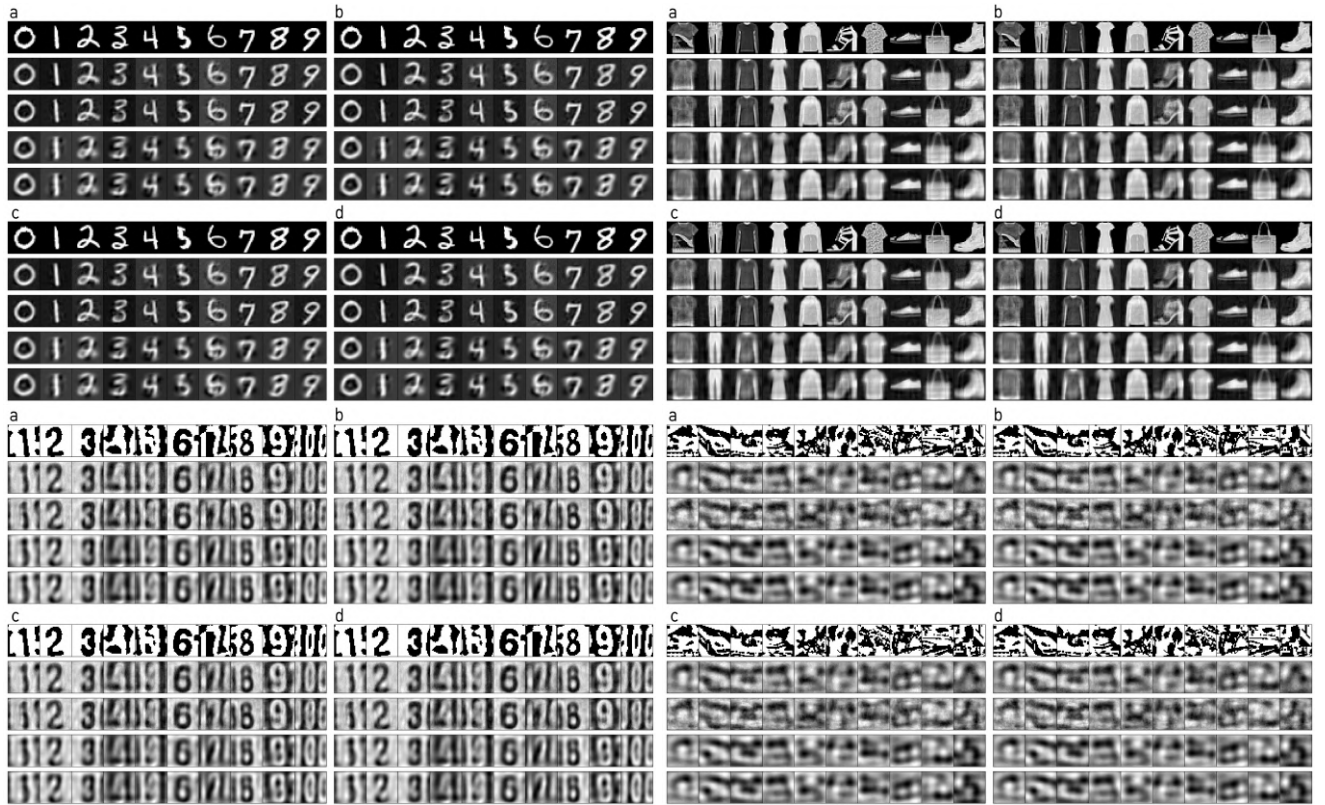

**Figure S5.** The reconstructed input images when the code size is (a) 8, (b) 12, (c) 16, and (d) 20. From top to bottom and left to right: MNIST, FMNIST, SVHN, and CIFAR10.

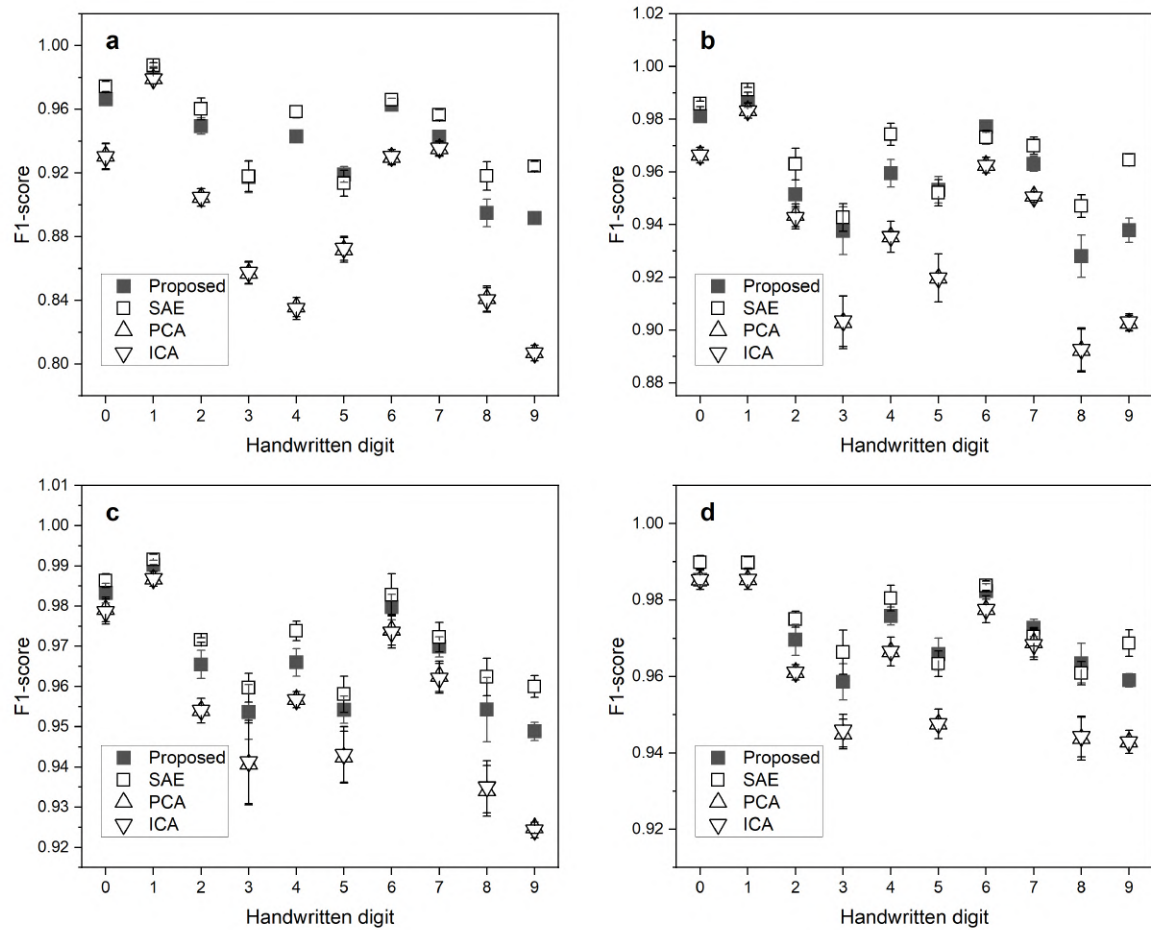

**Figure S6.** Plots of the F1 score for each class label of MNIST when the number of codes is (a) 8, (b) 12, (c) 16, and (d) 20.

| (a) FMNIST: F1 score obtained using FMNIST |             |      |      |      |      |      |      |      |      |      |
|--------------------------------------------|-------------|------|------|------|------|------|------|------|------|------|
| code size 8                                |             |      |      |      |      |      |      |      |      |      |
| Model                                      | class label |      |      |      |      |      |      |      |      |      |
|                                            | 0           | 1    | 2    | 3    | 4    | 5    | 6    | 7    | 8    | 9    |
| Proposed                                   | 0.76        | 0.96 | 0.67 | 0.81 | 0.65 | 0.90 | 0.56 | 0.89 | 0.94 | 0.91 |
| SAE                                        | 0.76        | 0.96 | 0.69 | 0.82 | 0.67 | 0.90 | 0.56 | 0.89 | 0.95 | 0.91 |
| PCA                                        | 0.73        | 0.93 | 0.58 | 0.76 | 0.58 | 0.88 | 0.49 | 0.87 | 0.91 | 0.90 |
| ICA                                        | 0.73        | 0.93 | 0.59 | 0.76 | 0.57 | 0.88 | 0.48 | 0.87 | 0.91 | 0.90 |
| code size 12                               |             |      |      |      |      |      |      |      |      |      |
| Model                                      | class label |      |      |      |      |      |      |      |      |      |
|                                            | 0           | 1    | 2    | 3    | 4    | 5    | 6    | 7    | 8    | 9    |
| Proposed                                   | 0.79        | 0.97 | 0.74 | 0.85 | 0.74 | 0.92 | 0.61 | 0.91 | 0.96 | 0.93 |
| SAE                                        | 0.79        | 0.97 | 0.74 | 0.86 | 0.75 | 0.93 | 0.61 | 0.91 | 0.97 | 0.93 |
| PCA                                        | 0.77        | 0.97 | 0.69 | 0.84 | 0.70 | 0.91 | 0.59 | 0.90 | 0.95 | 0.92 |
| ICA                                        | 0.77        | 0.97 | 0.69 | 0.84 | 0.70 | 0.91 | 0.59 | 0.90 | 0.95 | 0.92 |
| code size 16                               |             |      |      |      |      |      |      |      |      |      |
| Model                                      | class label |      |      |      |      |      |      |      |      |      |
|                                            | 0           | 1    | 2    | 3    | 4    | 5    | 6    | 7    | 8    | 9    |
| Proposed                                   | 0.79        | 0.97 | 0.76 | 0.85 | 0.75 | 0.94 | 0.61 | 0.92 | 0.96 | 0.94 |
| SAE                                        | 0.79        | 0.98 | 0.75 | 0.86 | 0.75 | 0.93 | 0.63 | 0.92 | 0.96 | 0.95 |
| PCA                                        | 0.79        | 0.97 | 0.73 | 0.85 | 0.75 | 0.92 | 0.61 | 0.91 | 0.95 | 0.93 |
| ICA                                        | 0.79        | 0.97 | 0.73 | 0.85 | 0.75 | 0.92 | 0.61 | 0.91 | 0.95 | 0.93 |
| code size 20                               |             |      |      |      |      |      |      |      |      |      |
| Model                                      | class label |      |      |      |      |      |      |      |      |      |
|                                            | 0           | 1    | 2    | 3    | 4    | 5    | 6    | 7    | 8    | 9    |
| Proposed                                   | 0.79        | 0.98 | 0.74 | 0.87 | 0.74 | 0.94 | 0.64 | 0.92 | 0.96 | 0.94 |
| SAE                                        | 0.81        | 0.97 | 0.76 | 0.87 | 0.75 | 0.94 | 0.64 | 0.93 | 0.95 | 0.94 |
| PCA                                        | 0.79        | 0.96 | 0.73 | 0.84 | 0.74 | 0.92 | 0.61 | 0.91 | 0.95 | 0.93 |
| ICA                                        | 0.79        | 0.96 | 0.73 | 0.84 | 0.74 | 0.92 | 0.61 | 0.91 | 0.95 | 0.93 |

| (b) SVHN: F1 score obtained using SVHN dataset |             |      |      |      |      |      |      |      |      |      |
|------------------------------------------------|-------------|------|------|------|------|------|------|------|------|------|
| code size 8                                    |             |      |      |      |      |      |      |      |      |      |
| Model                                          | class label |      |      |      |      |      |      |      |      |      |
|                                                | 0           | 1    | 2    | 3    | 4    | 5    | 6    | 7    | 8    | 9    |
| Proposed                                       | 0.64        | 0.54 | 0.42 | 0.49 | 0.26 | 0.27 | 0.46 | 0.18 | 0.15 | 0.31 |
| SAE                                            | 0.65        | 0.57 | 0.46 | 0.53 | 0.34 | 0.27 | 0.53 | 0.18 | 0.20 | 0.36 |
| PCA                                            | 0.60        | 0.42 | 0.32 | 0.41 | 0.20 | 0.25 | 0.33 | 0.14 | 0.08 | 0.20 |
| ICA                                            | 0.60        | 0.42 | 0.32 | 0.41 | 0.20 | 0.25 | 0.34 | 0.14 | 0.08 | 0.20 |
| code size 12                                   |             |      |      |      |      |      |      |      |      |      |
| Model                                          | class label |      |      |      |      |      |      |      |      |      |
|                                                | 0           | 1    | 2    | 3    | 4    | 5    | 6    | 7    | 8    | 9    |
| Proposed                                       | 0.73        | 0.64 | 0.54 | 0.65 | 0.41 | 0.44 | 0.62 | 0.31 | 0.31 | 0.46 |
| SAE                                            | 0.74        | 0.68 | 0.54 | 0.67 | 0.46 | 0.47 | 0.64 | 0.34 | 0.35 | 0.50 |
| PCA                                            | 0.71        | 0.57 | 0.46 | 0.60 | 0.38 | 0.40 | 0.55 | 0.28 | 0.28 | 0.40 |
| ICA                                            | 0.71        | 0.57 | 0.46 | 0.60 | 0.38 | 0.40 | 0.55 | 0.29 | 0.29 | 0.40 |
| code size 16                                   |             |      |      |      |      |      |      |      |      |      |
| Model                                          | class label |      |      |      |      |      |      |      |      |      |
|                                                | 0           | 1    | 2    | 3    | 4    | 5    | 6    | 7    | 8    | 9    |
| Proposed                                       | 0.75        | 0.69 | 0.55 | 0.67 | 0.54 | 0.49 | 0.68 | 0.43 | 0.46 | 0.52 |
| SAE                                            | 0.74        | 0.70 | 0.55 | 0.69 | 0.51 | 0.48 | 0.68 | 0.40 | 0.50 | 0.54 |
| PCA                                            | 0.74        | 0.66 | 0.52 | 0.68 | 0.45 | 0.45 | 0.68 | 0.38 | 0.39 | 0.49 |
| ICA                                            | 0.74        | 0.66 | 0.52 | 0.68 | 0.45 | 0.45 | 0.68 | 0.38 | 0.40 | 0.49 |
| code size 20                                   |             |      |      |      |      |      |      |      |      |      |
| Model                                          | class label |      |      |      |      |      |      |      |      |      |
|                                                | 0           | 1    | 2    | 3    | 4    | 5    | 6    | 7    | 8    | 9    |
| Proposed                                       | 0.77        | 0.71 | 0.61 | 0.73 | 0.57 | 0.55 | 0.70 | 0.51 | 0.53 | 0.59 |
| SAE                                            | 0.76        | 0.73 | 0.59 | 0.72 | 0.56 | 0.53 | 0.69 | 0.47 | 0.53 | 0.58 |
| PCA                                            | 0.77        | 0.69 | 0.59 | 0.72 | 0.54 | 0.53 | 0.71 | 0.47 | 0.47 | 0.57 |
| ICA                                            | 0.76        | 0.69 | 0.59 | 0.72 | 0.54 | 0.53 | 0.71 | 0.47 | 0.47 | 0.57 |

| (c) CIFAR10: F1 score obtained using CIFAR10 dataset |             |      |      |      |      |      |      |      |      |      |
|------------------------------------------------------|-------------|------|------|------|------|------|------|------|------|------|
| code size 8                                          |             |      |      |      |      |      |      |      |      |      |
| Model                                                | class label |      |      |      |      |      |      |      |      |      |
|                                                      | 0           | 1    | 2    | 3    | 4    | 5    | 6    | 7    | 8    | 9    |
| Proposed                                             | 0.38        | 0.36 | 0.27 | 0.13 | 0.25 | 0.28 | 0.36 | 0.36 | 0.41 | 0.35 |
| SAE                                                  | 0.38        | 0.35 | 0.25 | 0.12 | 0.23 | 0.27 | 0.34 | 0.37 | 0.40 | 0.34 |
| PCA                                                  | 0.34        | 0.34 | 0.26 | 0.08 | 0.23 | 0.26 | 0.33 | 0.37 | 0.41 | 0.33 |
| ICA                                                  | 0.34        | 0.34 | 0.26 | 0.08 | 0.23 | 0.26 | 0.33 | 0.37 | 0.41 | 0.33 |
| code size 12                                         |             |      |      |      |      |      |      |      |      |      |
| Model                                                | class label |      |      |      |      |      |      |      |      |      |
|                                                      | 0           | 1    | 2    | 3    | 4    | 5    | 6    | 7    | 8    | 9    |
| Proposed                                             | 0.41        | 0.40 | 0.26 | 0.14 | 0.27 | 0.30 | 0.39 | 0.40 | 0.42 | 0.36 |
| SAE                                                  | 0.37        | 0.38 | 0.26 | 0.17 | 0.24 | 0.30 | 0.39 | 0.39 | 0.43 | 0.34 |
| PCA                                                  | 0.40        | 0.36 | 0.26 | 0.13 | 0.25 | 0.29 | 0.39 | 0.39 | 0.42 | 0.35 |
| ICA                                                  | 0.40        | 0.36 | 0.26 | 0.13 | 0.25 | 0.29 | 0.39 | 0.39 | 0.42 | 0.35 |
| code size 16                                         |             |      |      |      |      |      |      |      |      |      |
| Model                                                | class label |      |      |      |      |      |      |      |      |      |
|                                                      | 0           | 1    | 2    | 3    | 4    | 5    | 6    | 7    | 8    | 9    |
| Proposed                                             | 0.43        | 0.42 | 0.29 | 0.17 | 0.29 | 0.32 | 0.40 | 0.41 | 0.43 | 0.37 |
| SAE                                                  | 0.39        | 0.40 | 0.28 | 0.20 | 0.27 | 0.31 | 0.41 | 0.41 | 0.42 | 0.35 |
| PCA                                                  | 0.43        | 0.40 | 0.27 | 0.19 | 0.27 | 0.31 | 0.42 | 0.41 | 0.44 | 0.36 |
| ICA                                                  | 0.43        | 0.40 | 0.27 | 0.19 | 0.27 | 0.31 | 0.42 | 0.41 | 0.44 | 0.36 |
| code size 20                                         |             |      |      |      |      |      |      |      |      |      |
| Model                                                | class label |      |      |      |      |      |      |      |      |      |
|                                                      | 0           | 1    | 2    | 3    | 4    | 5    | 6    | 7    | 8    | 9    |
| Proposed                                             | 0.42        | 0.42 | 0.27 | 0.19 | 0.26 | 0.30 | 0.41 | 0.40 | 0.40 | 0.37 |
| SAE                                                  | 0.39        | 0.41 | 0.26 | 0.18 | 0.25 | 0.28 | 0.38 | 0.39 | 0.41 | 0.35 |
| PCA                                                  | 0.41        | 0.41 | 0.26 | 0.20 | 0.25 | 0.29 | 0.40 | 0.41 | 0.40 | 0.35 |
| ICA                                                  | 0.41        | 0.41 | 0.26 | 0.20 | 0.25 | 0.29 | 0.40 | 0.41 | 0.40 | 0.35 |

**Figure S7.** Results of F1 score for each class label when the number of codes is 8, 12, 16, and 20. (a) FMNIST, (b) SVHN, and (c) CIFAR10

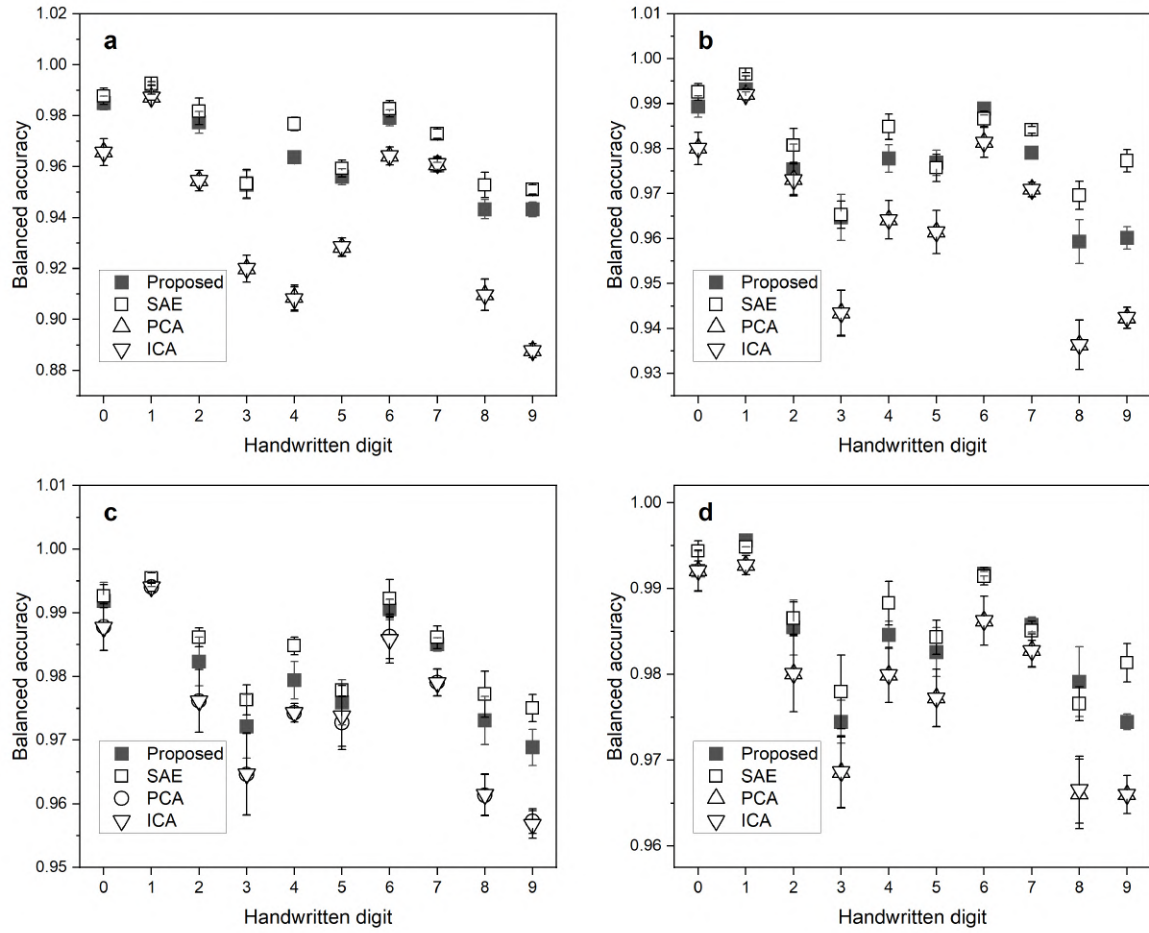

**Figure S8.** Plots of balanced accuracy for each class label of MNIST when the number of codes is (a) 8, (b) 12, (c) 16, and (d) 20.



| (a) FMNIST: Balanced accuracy obtained using FMNIST dataset   |             |      |      |      |      |      |      |      |      |      |
|---------------------------------------------------------------|-------------|------|------|------|------|------|------|------|------|------|
| code size 8                                                   |             |      |      |      |      |      |      |      |      |      |
| Model                                                         | class label |      |      |      |      |      |      |      |      |      |
|                                                               | 0           | 1    | 2    | 3    | 4    | 5    | 6    | 7    | 8    | 9    |
| Proposed                                                      | 0.86        | 0.97 | 0.82 | 0.90 | 0.80 | 0.94 | 0.76 | 0.94 | 0.97 | 0.95 |
| SAE                                                           | 0.86        | 0.98 | 0.83 | 0.91 | 0.81 | 0.94 | 0.76 | 0.94 | 0.97 | 0.95 |
| PCA                                                           | 0.84        | 0.95 | 0.76 | 0.88 | 0.76 | 0.93 | 0.72 | 0.94 | 0.96 | 0.94 |
| ICA                                                           | 0.84        | 0.95 | 0.77 | 0.88 | 0.76 | 0.93 | 0.72 | 0.94 | 0.96 | 0.94 |
| code size 12                                                  |             |      |      |      |      |      |      |      |      |      |
| Model                                                         | class label |      |      |      |      |      |      |      |      |      |
|                                                               | 0           | 1    | 2    | 3    | 4    | 5    | 6    | 7    | 8    | 9    |
| Proposed                                                      | 0.88        | 0.98 | 0.86 | 0.92 | 0.86 | 0.95 | 0.78 | 0.95 | 0.98 | 0.96 |
| SAE                                                           | 0.89        | 0.98 | 0.86 | 0.93 | 0.86 | 0.95 | 0.78 | 0.96 | 0.98 | 0.96 |
| PCA                                                           | 0.87        | 0.98 | 0.83 | 0.92 | 0.83 | 0.95 | 0.77 | 0.95 | 0.97 | 0.95 |
| ICA                                                           | 0.87        | 0.98 | 0.83 | 0.92 | 0.83 | 0.95 | 0.77 | 0.95 | 0.97 | 0.95 |
| code size 16                                                  |             |      |      |      |      |      |      |      |      |      |
| Model                                                         | class label |      |      |      |      |      |      |      |      |      |
|                                                               | 0           | 1    | 2    | 3    | 4    | 5    | 6    | 7    | 8    | 9    |
| Proposed                                                      | 0.88        | 0.98 | 0.86 | 0.92 | 0.87 | 0.96 | 0.78 | 0.96 | 0.97 | 0.97 |
| SAE                                                           | 0.88        | 0.98 | 0.86 | 0.93 | 0.86 | 0.96 | 0.80 | 0.96 | 0.98 | 0.97 |
| PCA                                                           | 0.88        | 0.98 | 0.84 | 0.92 | 0.86 | 0.96 | 0.79 | 0.95 | 0.97 | 0.96 |
| ICA                                                           | 0.88        | 0.98 | 0.84 | 0.92 | 0.86 | 0.96 | 0.78 | 0.95 | 0.97 | 0.96 |
| code size 20                                                  |             |      |      |      |      |      |      |      |      |      |
| Model                                                         | class label |      |      |      |      |      |      |      |      |      |
|                                                               | 0           | 1    | 2    | 3    | 4    | 5    | 6    | 7    | 8    | 9    |
| Proposed                                                      | 0.88        | 0.98 | 0.85 | 0.93 | 0.86 | 0.96 | 0.80 | 0.96 | 0.98 | 0.97 |
| SAE                                                           | 0.89        | 0.98 | 0.87 | 0.93 | 0.86 | 0.96 | 0.80 | 0.96 | 0.98 | 0.97 |
| PCA                                                           | 0.88        | 0.97 | 0.85 | 0.91 | 0.85 | 0.95 | 0.79 | 0.96 | 0.98 | 0.96 |
| ICA                                                           | 0.88        | 0.97 | 0.85 | 0.91 | 0.85 | 0.95 | 0.79 | 0.96 | 0.98 | 0.96 |
| (b) SVHN: Balanced accuracy obtained by SVHN dataset          |             |      |      |      |      |      |      |      |      |      |
| code size 8                                                   |             |      |      |      |      |      |      |      |      |      |
| Model                                                         | class label |      |      |      |      |      |      |      |      |      |
|                                                               | 0           | 1    | 2    | 3    | 4    | 5    | 6    | 7    | 8    | 9    |
| Proposed                                                      | 0.80        | 0.74 | 0.67 | 0.71 | 0.59 | 0.60 | 0.69 | 0.56 | 0.54 | 0.63 |
| SAE                                                           | 0.81        | 0.75 | 0.69 | 0.73 | 0.63 | 0.60 | 0.72 | 0.56 | 0.57 | 0.65 |
| PCA                                                           | 0.78        | 0.67 | 0.62 | 0.67 | 0.56 | 0.59 | 0.63 | 0.54 | 0.51 | 0.57 |
| ICA                                                           | 0.78        | 0.67 | 0.62 | 0.67 | 0.56 | 0.59 | 0.63 | 0.54 | 0.51 | 0.57 |
| code size 12                                                  |             |      |      |      |      |      |      |      |      |      |
| Model                                                         | class label |      |      |      |      |      |      |      |      |      |
|                                                               | 0           | 1    | 2    | 3    | 4    | 5    | 6    | 7    | 8    | 9    |
| Proposed                                                      | 0.85        | 0.79 | 0.75 | 0.80 | 0.67 | 0.70 | 0.78 | 0.63 | 0.61 | 0.71 |
| SAE                                                           | 0.85        | 0.81 | 0.75 | 0.80 | 0.70 | 0.71 | 0.79 | 0.64 | 0.64 | 0.73 |
| PCA                                                           | 0.83        | 0.75 | 0.70 | 0.77 | 0.65 | 0.67 | 0.75 | 0.61 | 0.60 | 0.68 |
| ICA                                                           | 0.83        | 0.75 | 0.70 | 0.77 | 0.65 | 0.67 | 0.75 | 0.62 | 0.61 | 0.67 |
| code size 16                                                  |             |      |      |      |      |      |      |      |      |      |
| Model                                                         | class label |      |      |      |      |      |      |      |      |      |
|                                                               | 0           | 1    | 2    | 3    | 4    | 5    | 6    | 7    | 8    | 9    |
| Proposed                                                      | 0.86        | 0.82 | 0.75 | 0.81 | 0.74 | 0.72 | 0.81 | 0.69 | 0.70 | 0.74 |
| SAE                                                           | 0.85        | 0.83 | 0.76 | 0.82 | 0.72 | 0.72 | 0.82 | 0.68 | 0.72 | 0.75 |
| PCA                                                           | 0.85        | 0.80 | 0.74 | 0.81 | 0.69 | 0.70 | 0.82 | 0.67 | 0.66 | 0.72 |
| ICA                                                           | 0.85        | 0.80 | 0.74 | 0.81 | 0.69 | 0.70 | 0.82 | 0.67 | 0.66 | 0.72 |
| code size 20                                                  |             |      |      |      |      |      |      |      |      |      |
| Model                                                         | class label |      |      |      |      |      |      |      |      |      |
|                                                               | 0           | 1    | 2    | 3    | 4    | 5    | 6    | 7    | 8    | 9    |
| Proposed                                                      | 0.87        | 0.83 | 0.79 | 0.84 | 0.76 | 0.75 | 0.82 | 0.74 | 0.73 | 0.77 |
| SAE                                                           | 0.87        | 0.84 | 0.78 | 0.83 | 0.75 | 0.74 | 0.82 | 0.71 | 0.73 | 0.77 |
| PCA                                                           | 0.87        | 0.83 | 0.78 | 0.83 | 0.74 | 0.74 | 0.83 | 0.71 | 0.69 | 0.76 |
| ICA                                                           | 0.87        | 0.83 | 0.78 | 0.83 | 0.74 | 0.74 | 0.83 | 0.71 | 0.69 | 0.76 |
| (c) CIFAR10: Balanced accuracy obtained using CIFAR10 dataset |             |      |      |      |      |      |      |      |      |      |
| code size 8                                                   |             |      |      |      |      |      |      |      |      |      |
| Model                                                         | class label |      |      |      |      |      |      |      |      |      |
|                                                               | 0           | 1    | 2    | 3    | 4    | 5    | 6    | 7    | 8    | 9    |
| Proposed                                                      | 0.64        | 0.65 | 0.59 | 0.53 | 0.59 | 0.59 | 0.67 | 0.64 | 0.68 | 0.65 |
| SAE                                                           | 0.64        | 0.64 | 0.58 | 0.53 | 0.58 | 0.59 | 0.66 | 0.65 | 0.67 | 0.65 |
| PCA                                                           | 0.62        | 0.64 | 0.59 | 0.51 | 0.57 | 0.59 | 0.66 | 0.65 | 0.68 | 0.64 |
| ICA                                                           | 0.62        | 0.64 | 0.58 | 0.51 | 0.57 | 0.59 | 0.66 | 0.65 | 0.67 | 0.64 |
| code size 12                                                  |             |      |      |      |      |      |      |      |      |      |
| Model                                                         | class label |      |      |      |      |      |      |      |      |      |
|                                                               | 0           | 1    | 2    | 3    | 4    | 5    | 6    | 7    | 8    | 9    |
| Proposed                                                      | 0.66        | 0.67 | 0.58 | 0.53 | 0.60 | 0.61 | 0.69 | 0.67 | 0.68 | 0.65 |
| SAE                                                           | 0.64        | 0.67 | 0.59 | 0.54 | 0.58 | 0.61 | 0.69 | 0.66 | 0.68 | 0.64 |
| PCA                                                           | 0.65        | 0.65 | 0.58 | 0.52 | 0.59 | 0.60 | 0.69 | 0.66 | 0.68 | 0.65 |
| ICA                                                           | 0.65        | 0.65 | 0.58 | 0.52 | 0.59 | 0.60 | 0.69 | 0.66 | 0.68 | 0.65 |
| code size 16                                                  |             |      |      |      |      |      |      |      |      |      |
| Model                                                         | class label |      |      |      |      |      |      |      |      |      |
|                                                               | 0           | 1    | 2    | 3    | 4    | 5    | 6    | 7    | 8    | 9    |
| Proposed                                                      | 0.67        | 0.69 | 0.60 | 0.54 | 0.61 | 0.62 | 0.69 | 0.67 | 0.68 | 0.66 |
| SAE                                                           | 0.65        | 0.67 | 0.60 | 0.55 | 0.59 | 0.62 | 0.69 | 0.67 | 0.68 | 0.65 |
| PCA                                                           | 0.67        | 0.68 | 0.59 | 0.55 | 0.60 | 0.62 | 0.69 | 0.67 | 0.69 | 0.66 |
| ICA                                                           | 0.67        | 0.68 | 0.59 | 0.55 | 0.60 | 0.62 | 0.69 | 0.67 | 0.69 | 0.66 |
| code size 20                                                  |             |      |      |      |      |      |      |      |      |      |
| Model                                                         | class label |      |      |      |      |      |      |      |      |      |
|                                                               | 0           | 1    | 2    | 3    | 4    | 5    | 6    | 7    | 8    | 9    |
| Proposed                                                      | 0.67        | 0.68 | 0.59 | 0.55 | 0.59 | 0.61 | 0.68 | 0.67 | 0.67 | 0.65 |
| SAE                                                           | 0.66        | 0.67 | 0.59 | 0.55 | 0.58 | 0.60 | 0.66 | 0.67 | 0.67 | 0.65 |
| PCA                                                           | 0.66        | 0.68 | 0.59 | 0.56 | 0.58 | 0.61 | 0.67 | 0.67 | 0.67 | 0.65 |
| ICA                                                           | 0.67        | 0.68 | 0.59 | 0.56 | 0.58 | 0.60 | 0.67 | 0.67 | 0.67 | 0.64 |

**Figure S9.** Results of balanced accuracy for each class label when the number of codes is 8, 12, 16, and 20. (a) FMNIST, (b) SVHN, and (c) CIFAR10
